# Supplementary material for: Oil and natural gas rents and CO2 emissions nexus in MENA: spatial analysis
Source: PeerJ. 2023 Jul 12;11:e15708. doi: 10.7717/peerj.15708 (PMC10349556; doi:10.7717/peerj.15708)
Supplement: Supplemental Information 1 [file peerj-11-15708-s001.xlsx]

## Sheet: Sheet1
Country	ID	Year	CO2 emissions (metric tons per capita)	GDP per capita (constant 2015 US$)	Natural gas rents (% of GDP)	Oil rents (% of GDP)		SDM command
Algeria	1	2000	2.57874	3111.18	3.67217	20.6072		xsmle lCO2it Yit Yit2 ORit NGRit, wmat(w) model (sdm) fe type(both) nsim(500) effects hausman durbin(Yit ORit NGRit)
Algeria	1	2001	2.50067	3162.81	4.16739	17.5572		xsmle lCO2it Yit Yit2 ORit NGRit, wmat(w) model (sdm) re type(both) nsim(500) effects hausman durbin(Yit ORit NGRit)
Algeria	1	2002	2.58671	3297.61	3.34871	18.3856
Algeria	1	2003	2.73337	3490.22	3.06855	20.2196		Pooled OLS and FE commands
Algeria	1	2004	2.73735	3592.65	2.72462	22.2172		xi:regress lCO2it Yit Yit2 ORit NGRit,
Algeria	1	2005	2.84135	3752.1	3.26906	29.0856		xi:regress lCO2it Yit Yit2 ORit NGRit i.id,
Algeria	1	2006	2.96691	3760.16	3.58068	30.6587		xi:regress lCO2it Yit Yit2 ORit NGRit i.year,
Algeria	1	2007	3.00729	3828.15	3.52726	28.6757		xi:regress lCO2it Yit Yit2 ORit NGRit i.id i.year,
Algeria	1	2008	3.10245	3856.41	3.31266	30.4822
Algeria	1	2009	3.17457	3851.21	3.61783	20.6319
Algeria	1	2010	3.17365	3918.49	2.58845	23.3755
Algeria	1	2011	3.29474	3956.9	3.4953	27.2701
Algeria	1	2012	3.60931	4012.36	3.59349	26.1166
Algeria	1	2013	3.64498	4042.92	3.74305	23.7954
Algeria	1	2014	3.79563	4112.08	3.41504	20.4732
Algeria	1	2015	3.9335	4177.89	2.76448	12.8394
Algeria	1	2016	3.82009	4224.04	1.74329	10.0283
Algeria	1	2017	3.82564	4192.34	1.91932	12.1211
Algeria	1	2018	3.92011	4154.22	2.70204	15.648
Algeria	1	2019	3.97765	4115.4	1.88968	14.3078
Bahrain	2	2000	23.8937	23243.6	2.21667	18.9957
Bahrain	2	2001	23.4965	22697.6	2.80817	15.3147
Bahrain	2	2002	23.4241	22258.2	2.20522	14.78
Bahrain	2	2003	23.0382	22335.9	2.0189	15.2934
Bahrain	2	2004	21.6064	22422.7	1.7804	16.9404
Bahrain	2	2005	23.2692	22343.5	2.52654	20.5131
Bahrain	2	2006	23.4656	22069.3	2.99724	20.7413
Bahrain	2	2007	22.2024	22111.7	3.00567	19.0595
Bahrain	2	2008	22.2134	21833.4	3.20544	21.5459
Bahrain	2	2009	20.8594	21057.4	3.42416	14.0514
Bahrain	2	2010	20.929	20982.3	2.60262	17.1421
Bahrain	2	2011	20.3575	20774.2	3.85273	23.2261
Bahrain	2	2012	20.9009	21187.5	4.06388	19.8733
Bahrain	2	2013	21.9387	22079	4.24978	20.5889
Bahrain	2	2014	22.6634	22676.6	4.01248	18.5519
Bahrain	2	2015	22.291	22634.1	2.64761	9.60099
Bahrain	2	2016	21.2513	22552.7	1.36729	7.39733
Bahrain	2	2017	20.4273	22445.5	1.43111	8.72501
Bahrain	2	2018	19.6312	21818.7	1.95244	11.0841
Bahrain	2	2019	20.2661	21317.3	1.57303	9.74068
Egypt	3	2000	1.66508	2610.48	0.44329	7.15793
Egypt	3	2001	1.80606	2651.87	0.66187	5.6556
Egypt	3	2002	1.81073	2664.64	0.659502	6.49989
Egypt	3	2003	1.82654	2699.1	0.800602	8.0341
Egypt	3	2004	1.94817	2758.57	1.01826	10.2445
Egypt	3	2005	2.14794	2830.35	1.81038	12.315
Egypt	3	2006	2.22118	2970.94	2.53552	12.1536
Egypt	3	2007	2.34431	3126.27	2.40475	10.6041
Egypt	3	2008	2.3851	3290.94	2.38799	11.8798
Egypt	3	2009	2.43619	3381.12	2.06664	6.12145
Egypt	3	2010	2.42034	3485.28	1.45112	7.10078
Egypt	3	2011	2.43431	3472.6	2.20091	9.56592
Egypt	3	2012	2.48779	3472.15	2.01087	8.19238
Egypt	3	2013	2.4191	3468.47	1.85642	7.65498
Egypt	3	2014	2.42323	3489.86	1.39895	6.50467
Egypt	3	2015	2.44779	3562.93	0.729719	3.09339
Egypt	3	2016	2.44825	3638.89	0.370022	2.33473
Egypt	3	2017	2.51165	3712.6	0.725842	4.20458
Egypt	3	2018	2.51881	3831.2	1.18025	5.55964
Egypt	3	2019	2.48406	3964.99	0.801119	4.01684
Iran	4	2000	5.18794	3922.98	1.12141	31.2545
Iran	4	2001	5.32844	3966.91	1.30058	22.2781
Iran	4	2002	5.49708	4234.14	1.23332	20.6549
Iran	4	2003	5.72157	4543.35	1.12503	21.9976
Iran	4	2004	6.05732	4683.43	1.21019	25.2419
Iran	4	2005	6.4618	4776.63	1.69518	32.4173
Iran	4	2006	6.86247	4959.12	2.03946	31.968
Iran	4	2007	7.20725	5304.8	1.96654	25.3266
Iran	4	2008	7.25243	5260.29	2.05682	30.0542
Iran	4	2009	7.43629	5254.69	2.11217	17.3075
Iran	4	2010	7.33665	5496.22	1.59113	20.4759
Iran	4	2011	7.39667	5575.68	2.28228	24.7118
Iran	4	2012	7.40165	5302.46	2.50841	20.142
Iran	4	2013	7.63186	5157.44	3.39281	23.1363
Iran	4	2014	7.81442	5345.76	3.69361	23.0804
Iran	4	2015	7.63362	5200.68	2.68736	12.7578
Iran	4	2016	7.63172	5582.89	1.45547	11.8177
Iran	4	2017	7.76484	5657.97	1.68608	15.8384
Iran	4	2018	7.79252	5454.3	3.97643	31.1726
Iran	4	2019	7.59836	5308.92	3.49778	22.2242
Iraq	5	2000	3.72932	4337.42	0.13548	49.4381
Iraq	5	2001	4.02963	4284.26	0.191221	50.1971
Iraq	5	2002	3.65636	3818.85	0.145506	47.5265
Iraq	5	2003	3.16949	2351.71	0.149996	54.0155
Iraq	5	2004	3.34843	3515.35	0.0655067	65.8206
Iraq	5	2005	3.16207	3493.34	0.109347	66.5384
Iraq	5	2006	3.02243	3619.89	0.10897	64.6776
Iraq	5	2007	2.74621	3626.95	0.29825	53.2157
Iraq	5	2008	3.10508	3859.76	0.335496	55.0118
Iraq	5	2009	3.25129	3909.29	0.396071	38.0672
Iraq	5	2010	3.64972	4052.06	0.276401	42.183
Iraq	5	2011	3.67905	4218.38	0.297556	49.995
Iraq	5	2012	4.04515	4630.74	0.278502	48.7506
Iraq	5	2013	4.19519	4793.54	0.298177	44.4456
Iraq	5	2014	3.89516	4627.83	0.301088	45.605
Iraq	5	2015	3.74365	4688.32	0.246439	36.2135
Iraq	5	2016	3.88494	5183.41	0.180844	31.7198
Iraq	5	2017	4.12965	4961.4	0.189874	37.8014
Iraq	5	2018	4.24498	4975.38	0.234708	44.3055
Iraq	5	2019	4.44062	5132.7	0.174442	39.2996
Israel	6	2000	9.06344	28747.9	0.000168183	0.000567558
Israel	6	2001	8.99984	28106.9	0.000204196	0.000468457
Israel	6	2002	9.2968	27492.6	0.000164352	0.000645462
Israel	6	2003	9.407	27311	0.00016257	0.00043171
Israel	6	2004	9.27596	28151.3	0.0228495	0.000354926
Israel	6	2005	8.80362	28809.6	0.0470215	0.000499922
Israel	6	2006	9.12004	29939.9	0.0803963	0.00193767
Israel	6	2007	9.27564	31207.6	0.093668	0.00102245
Israel	6	2008	9.12735	31718.5	0.114394	0.00170214
Israel	6	2009	8.78086	31323.3	0.0871833	0.00103879
Israel	6	2010	9.25022	32504.7	0.0791163	0.000839911
Israel	6	2011	8.9907	33678.1	0.152189	0.00545884
Israel	6	2012	9.61507	33995.4	0.0984801	0.00333643
Israel	6	2013	8.31317	34960.9	0.198999	0.014791
Israel	6	2014	7.8776	35710.9	0.204828	0.0164263
Israel	6	2015	7.89251	35808.4	0.144001	0.00762934
Israel	6	2016	7.60356	36680.3	0.0815945	0.00863839
Israel	6	2017	7.52987	37550.7	0.0891118	0.00686889
Israel	6	2018	6.87621	38301.5	0.129233	0.0103027
Israel	6	2019	6.91959	38995.2	0.0911715	0.00869841
Jordan	7	2000	3.17619	3587.83	0.0712363	0.00438548
Jordan	7	2001	3.11462	3708.25	0.0782456	0.00338609
Jordan	7	2002	3.17254	3848.82	0.0541811	0.0016146
Jordan	7	2003	3.18548	3923.03	0.0598378	0.00177547
Jordan	7	2004	3.32961	4147.54	0.0620639	0.0020949
Jordan	7	2005	3.44628	4341.19	0.072739	0.00281245
Jordan	7	2006	3.36641	4515.59	0.0819087	0.00280428
Jordan	7	2007	3.37155	4678.84	0.0726781	0.00264864
Jordan	7	2008	3.05195	4786.75	0.0596434	0.00538238
Jordan	7	2009	2.99713	4781.61	0.0551949	0.00145364
Jordan	7	2010	2.78178	4644.17	0.0349754	0.0018013
Jordan	7	2011	2.70917	4521.41	0.0514526	0.00239911
Jordan	7	2012	2.98147	4386.75	0.0472724	0.00224602
Jordan	7	2013	2.79376	4274.55	0.0414392	0.00198434
Jordan	7	2014	2.86473	4221.09	0.0311706	0.00167468
Jordan	7	2015	2.73132	4164.11	0.0190799	0.000850357
Jordan	7	2016	2.59779	4119.25	0.00852391	0.000656251
Jordan	7	2017	2.67223	4105.72	0.00905355	0.000238535
Jordan	7	2018	2.48662	4109.75	0.0118136	0.000993259
Jordan	7	2019	2.4382	4133.55	0.00845041	0.000860908
Kuwait	8	2000	24.3702	29951.6	0.529507	51.2624
Kuwait	8	2001	25.2892	29185.6	0.682505	43.5034
Kuwait	8	2002	26.0132	29591	0.463667	38.4216
Kuwait	8	2003	26.8872	34322.2	0.440254	40.3811
Kuwait	8	2004	28.1345	37168.6	0.439999	47.9048
Kuwait	8	2005	30.7947	39849.6	0.573478	55.4127
Kuwait	8	2006	30.514	40976.7	0.595605	52.4765
Kuwait	8	2007	28.1946	41170.7	0.5425	48.5533
Kuwait	8	2008	28.5541	39777.3	0.562858	53.7758
Kuwait	8	2009	27.5253	34800.3	0.666542	39.539
Kuwait	8	2010	26.9797	32035.4	0.52189	48.8849
Kuwait	8	2011	26.2906	33166.9	0.733171	58.1862
Kuwait	8	2012	25.4744	33455.2	0.811017	53.9457
Kuwait	8	2013	24.7733	32136.1	0.882306	53.0451
Kuwait	8	2014	23.1838	30857.2	0.798444	50.9575
Kuwait	8	2015	23.209	29869.6	0.787375	37.0754
Kuwait	8	2016	23.137	29801.2	0.459936	32.5206
Kuwait	8	2017	22.3688	27702.2	0.471194	36.9683
Kuwait	8	2018	22.0892	27819.4	0.615274	45.1217
Kuwait	8	2019	22.0224	27207.1	0.492658	40.541
Libya	9	2000	8.34656	10746.8	0.319599	34.2692
Libya	9	2001	8.16608	10391.8	0.454107	30.4403
Libya	9	2002	8.24249	10128.7	0.584821	49.7999
Libya	9	2003	8.70378	11264.8	0.441368	48.9508
Libya	9	2004	8.48662	11582.8	0.583864	54.8296
Libya	9	2005	9.13839	12760.1	0.899331	61.7497
Libya	9	2006	8.98949	13385.8	1.17526	66.6847
Libya	9	2007	8.2664	14010.5	1.25393	59.9692
Libya	9	2008	8.79226	13794	1.18875	63.249
Libya	9	2009	9.19467	13025.2	1.55136	48.245
Libya	9	2010	9.60845	13539.5	1.15025	55.8876
Libya	9	2011	6.71475	6670.35	1.88867	49.5418
Libya	9	2012	9.16836	12386	1.35532	62.2979
Libya	9	2013	9.27322	10101.2	1.83921	51.057
Libya	9	2014	9.11657	7722.66	3.47787	39.7338
Libya	9	2015	7.99743	7590.44	2.97985	24.8548
Libya	9	2016	7.84793	7392.22	1.72326	20.1994
Libya	9	2017	8.38206	9662.28	1.25926	36.7239
Libya	9	2018	8.47787	10276.8	1.26295	42.4708
Libya	9	2019	8.38073	8993.09	1.04081	43.8548
Morocco	10	2000	1.14192	1763.4	0.00276741	0.00646162
Morocco	10	2001	1.24527	1869.67	0.00324835	0.00400936
Morocco	10	2002	1.27212	1905.07	0.00237947	0.00495774
Morocco	10	2003	1.25072	1994.82	0.00193307	0.00361978
Morocco	10	2004	1.36111	2066	0.00279211	0.00459145
Morocco	10	2005	1.43094	2109.06	0.00277397	0.00413871
Morocco	10	2006	1.46082	2242.4	0.00482549	0.00640423
Morocco	10	2007	1.48731	2294.51	0.00510977	0.00656626
Morocco	10	2008	1.54201	2401.6	0.00421942	0.00617614
Morocco	10	2009	1.52682	2472.79	0.00329444	0.00319795
Morocco	10	2010	1.60033	2534.26	0.00335347	0.00545875
Morocco	10	2011	1.70643	2631.45	0.00568338	0.00730123
Morocco	10	2012	1.74719	2673.05	0.00849819	0.00526939
Morocco	10	2013	1.70811	2754.85	0.00990738	0.00532179
Morocco	10	2014	1.71647	2788.72	0.00905804	0.00292018
Morocco	10	2015	1.74275	2875.26	0.00480126	0.00153741
Morocco	10	2016	1.71723	2867.02	0.00233425	0.00119951
Morocco	10	2017	1.78521	2950.21	0.0025436	0.0013903
Morocco	10	2018	1.80299	3004.63	0.00363983	0.00185812
Morocco	10	2019	1.95987	3044.91	0.00302062	0.00147034
Oman	11	2000	11.0716	20624.8	1.15849	45.5248
Oman	11	2001	12.2137	21296	2.09209	37.3335
Oman	11	2002	12.8359	20701.6	1.76587	34.4642
Oman	11	2003	13.2849	19715.9	1.88046	34.2865
Oman	11	2004	12.7825	19486	1.90288	37.7393
Oman	11	2005	12.3484	19448.5	2.65997	44.0989
Oman	11	2006	15.1855	19941.3	3.36348	41.8458
Oman	11	2007	15.9042	20230.3	3.41	38.2495
Oman	11	2008	15.0166	21142.9	2.71771	37.9852
Oman	11	2009	15.1555	21458.4	3.19918	29.9473
Oman	11	2010	15.4795	20640.3	2.43124	37.1248
Oman	11	2011	16.4929	19868.1	3.51022	46.1754
Oman	11	2012	17.3097	20102.2	3.54408	42.7638
Oman	11	2013	16.7366	19654.2	3.8827	40.9903
Oman	11	2014	16.4852	18610.8	3.3157	36.0779
Oman	11	2015	16.4341	18444.9	2.53313	21.3867
Oman	11	2016	16.1033	18459.2	1.46801	18.2614
Oman	11	2017	15.416	17774.5	1.60703	21.7657
Oman	11	2018	15.6539	17393.5	2.29446	26.6783
Oman	11	2019	15.2824	16694.1	1.79673	24.8643
Qatar	12	2000	48.374	56865	3.17735	38.8454
Qatar	12	2001	46.5844	56915.8	4.20379	31.6077
Qatar	12	2002	50.7122	58542.1	3.3697	28.3293
Qatar	12	2003	50.954	57075.6	3.06394	31.0218
Qatar	12	2004	49.2081	61583	3.22658	34.0446
Qatar	12	2005	44.5338	57624.1	4.22124	38.8616
Qatar	12	2006	42.7983	61522.4	4.44142	34.5257
Qatar	12	2007	40.8965	60926.7	4.78596	30.7851
Qatar	12	2008	36.9187	60799.1	4.75133	31.1727
Qatar	12	2009	32.6718	59090.9	6.1177	23.2538
Qatar	12	2010	32.6343	63001.7	5.30313	25.3492
Qatar	12	2011	33.4944	65129.4	7.85994	29.5579
Qatar	12	2012	34.1882	63233.7	8.32222	28.2909
Qatar	12	2013	32.5989	62733.4	8.35851	25.058
Qatar	12	2014	33.2059	62784.9	7.49714	21.3288
Qatar	12	2015	33.0435	63039.1	6.11578	12.4882
Qatar	12	2016	32.7459	62800.4	3.50473	10.6076
Qatar	12	2017	32.128	60262.7	3.71567	12.8667
Qatar	12	2018	31.0675	59757.8	4.65512	15.5544
Qatar	12	2019	32.4745	59149.3	3.65523	13.677
Saudi Arabia	13	2000	12.082	17690.7	0.545321	41.1396
Saudi Arabia	13	2001	11.9839	17032.4	0.731354	33.1637
Saudi Arabia	13	2002	12.4855	16094.7	0.605857	31.0837
Saudi Arabia	13	2003	12.6836	17384.8	0.586081	36.77
Saudi Arabia	13	2004	12.9639	18219.9	0.608458	42.1154
Saudi Arabia	13	2005	13.2385	18683.4	0.818211	51.543
Saudi Arabia	13	2006	13.6924	18669.6	0.953898	51.2529
Saudi Arabia	13	2007	14.0808	18496.3	0.991187	47.5069
Saudi Arabia	13	2008	15.0538	19117.9	1.00782	54.4483
Saudi Arabia	13	2009	15.2657	18202.7	1.12457	34.2978
Saudi Arabia	13	2010	16.2694	18568.4	0.84925	38.9575
Saudi Arabia	13	2011	16.4064	19813.3	1.14716	50.7764
Saudi Arabia	13	2012	16.8915	20249.8	1.22752	48.3847
Saudi Arabia	13	2013	16.7446	20175.6	1.26035	45.1807
Saudi Arabia	13	2014	17.4832	20327.7	1.17274	40.4258
Saudi Arabia	13	2015	17.8194	20627.9	0.855248	23.571
Saudi Arabia	13	2016	17.2987	20503.4	0.498333	19.6203
Saudi Arabia	13	2017	16.4668	19947	0.556448	23.676
Saudi Arabia	13	2018	15.4664	20083.5	0.717721	29.2984
Saudi Arabia	13	2019	15.2846	19817.8	0.523929	24.6029
Syria	14	2000	2.70553	1340.56	0.145962	6.03411
Syria	14	2001	2.66781	1325.86	0.167358	4.23762
Syria	14	2002	2.59122	1352.64	0.143682	4.03397
Syria	14	2003	2.54835	1422.56	0.149689	4.3885
Syria	14	2004	2.60043	1485.56	0.132714	4.7312
Syria	14	2005	3.11636	1532.06	0.170137	5.70756
Syria	14	2006	3.15909	1550.42	0.197108	5.57104
Syria	14	2007	3.19948	1570.9	0.18323	4.78376
Syria	14	2008	3.15911	1578.81	0.174931	5.17892
Syria	14	2009	2.86241	1629.43	0.176526	2.91698
Syria	14	2010	2.85968	1701.45	0.179326	3.70216
Syria	14	2011	2.69996	1773.25	1.01286	18.7023
Syria	14	2012	2.30101	1347.28	1.35965	12.0857
Syria	14	2013	1.56805	1036.58	2.43248	9.75257
Syria	14	2014	1.42218	972.824	1.98211	3.29187
Syria	14	2015	1.40409	979.144	1.3852	2.7131
Syria	14	2016	1.50811	952.151	0.872933	2.7606
Syria	14	2017	1.71622	965.676	0.759502	1.76831
Syria	14	2018	1.6164	988.637	0.813226	2.47077
Syria	14	2019	1.50614	988.637	0.545982	2.57452
Tunisia	15	2000	2.13219	2881.29	0.248453	3.40769
Tunisia	15	2001	2.20239	2964.54	0.330614	2.39579
Tunisia	15	2002	2.19931	2980.21	0.243511	2.5341
Tunisia	15	2003	2.16183	3097.13	0.216942	2.4727
Tunisia	15	2004	2.243	3264.98	0.230636	3.06577
Tunisia	15	2005	2.27273	3350.57	0.31647	4.11392
Tunisia	15	2006	2.34286	3493.63	0.393024	4.69427
Tunisia	15	2007	2.40181	3690.59	0.374171	4.85077
Tunisia	15	2008	2.42452	3806.47	0.383061	5.65208
Tunisia	15	2009	2.40269	3880.85	0.434333	3.21647
Tunisia	15	2010	2.58762	3954.99	0.463264	3.96301
Tunisia	15	2011	2.45209	3835.59	0.689547	4.73427
Tunisia	15	2012	2.562	3958.59	0.740658	4.76579
Tunisia	15	2013	2.54269	4015.55	0.74317	4.22344
Tunisia	15	2014	2.70717	4098.4	0.605685	3.04403
Tunisia	15	2015	2.72631	4094.84	0.400471	1.17286
Tunisia	15	2016	2.61944	4095.18	0.202146	1.01935
Tunisia	15	2017	2.62038	4139.4	0.230083	1.37781
Tunisia	15	2018	2.58448	4199.66	0.313248	1.8234
Tunisia	15	2019	2.55756	4208.07	0.207876	1.58953
United Arab Emirates	16	2000	27.0352	60716.3	0.787847	21.1765
United Arab Emirates	16	2001	29.4303	58421.8	0.982994	16.2659
United Arab Emirates	16	2002	28.5015	56815.1	0.8219	14.6419
United Arab Emirates	16	2003	27.9693	57932.2	0.781387	17.1396
United Arab Emirates	16	2004	27.0389	57910.2	0.770201	20.0699
United Arab Emirates	16	2005	25.3824	53844.7	1.02083	24.7974
United Arab Emirates	16	2006	22.9351	51197.3	1.10419	25.0652
United Arab Emirates	16	2007	21.3703	45388.7	1.10841	22.8583
United Arab Emirates	16	2008	22.0115	40755.1	1.06643	27.3763
United Arab Emirates	16	2009	19.8323	34580.2	1.2136	17.975
United Arab Emirates	16	2010	19.0398	32534.8	0.928359	21.6572
United Arab Emirates	16	2011	18.5095	33246.1	1.27607	28.7481
United Arab Emirates	16	2012	19.2078	33996.5	1.35169	28.4379
United Arab Emirates	16	2013	20.0556	35495.8	1.35236	25.7524
United Arab Emirates	16	2014	20.0517	36995.7	1.1963	23.0463
United Arab Emirates	16	2015	21.0776	38663.4	0.922663	13.1212
United Arab Emirates	16	2016	21.4807	39400	0.50884	10.8086
United Arab Emirates	16	2017	20.769	39798.5	0.540899	13.0168
United Arab Emirates	16	2018	18.3907	39670.9	0.692937	16.5828
United Arab Emirates	16	2019	19.3296	40438.3	0.520151	16.3455
Yemen	17	2000	0.863343	2383.71	0.0985072	42.1826
Yemen	17	2001	0.896845	2404.05	0.114273	33.9683
Yemen	17	2002	0.872385	2427.49	0.0693672	31.7805
Yemen	17	2003	0.984988	2446.65	0.0523017	32.998
Yemen	17	2004	1.0046	2471.58	0.0395655	34.9371
Yemen	17	2005	1.04986	2536.15	0.0386722	42.2992
Yemen	17	2006	1.05957	2543.17	0.0313526	41.5226
Yemen	17	2007	1.09339	2554.62	0.0196883	33.355
Yemen	17	2008	1.10633	2574.06	0.00823146	33.8912
Yemen	17	2009	1.18003	2599.45	0.20141	20.2372
Yemen	17	2010	1.09826	2722.48	1.08978	22.1394
Yemen	17	2011	0.963978	2311.17	2.52872	23.4171
Yemen	17	2012	0.858491	2302.12	2.05998	16.9785
Yemen	17	2013	1.10669	2348.48	2.53793	11.0549
Yemen	17	2014	1.06221	2282.66	2.05844	8.92235
Yemen	17	2015	0.511362	1601.81	0.379334	1.67263
Yemen	17	2016	0.399364	1415.82	0.0488361	0.681566
Yemen	17	2017	0.359622	1311.82	0.0393119	1.76929
Yemen	17	2018	0.341068	1290.91	0.0233729	4.53131
Yemen	17	2019	0.380633	1279.21	0.0233729	4.53131
